# Supplementary material for: Usefulness of Systemic Venous Ultrasound Protocols in the Prognosis of Heart Failure Patients: Results from a Prospective Multicentric Study
Source: MDPI journal article supplement (doi:10.3390/jcm12041281), 2023-02-06
Supplement: s1 [file s1]

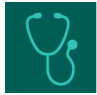

## Supplementary Materials: ROC analysis from all ultrasound parameters

### 1. ROC CURVE TO PREDICT MORTALITY (GLOBAL):

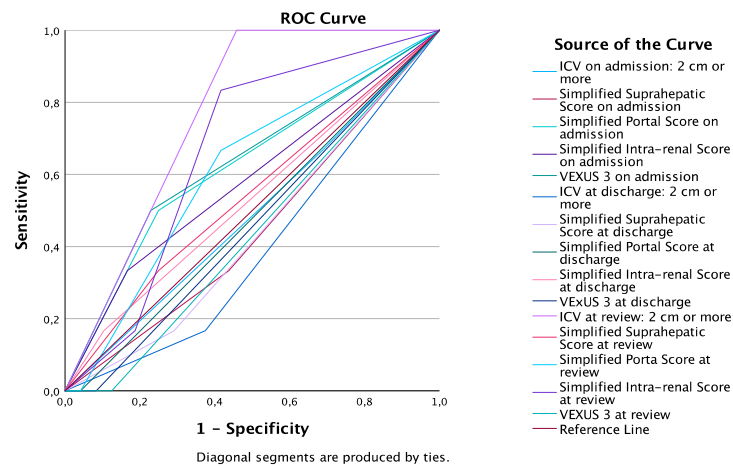

| Test Result Variable(s)                    | Area | Std. Error <sup>a</sup> | Asymptotic Sig. <sup>b</sup> | Asymptotic 95% Confidence Interval |             |
|--------------------------------------------|------|-------------------------|------------------------------|------------------------------------|-------------|
|                                            |      |                         |                              | Lower Bound                        | Upper Bound |
| ICV on admission: 2 cm or more             | ,490 | ,127                    | ,934                         | ,241                               | ,738        |
| Simplified Suprahepatic Score on admission | ,448 | ,123                    | ,680                         | ,207                               | ,689        |
| Simplified Portal Score on admission       | ,625 | ,128                    | ,322                         | ,374                               | ,876        |
| Simplified Intra-renal Score on admission  | ,583 | ,132                    | ,509                         | ,324                               | ,843        |
| VEXUS 3 on admission                       | ,635 | ,129                    | ,283                         | ,383                               | ,887        |
| ICV at discharge: 2 cm or more             | ,396 | ,114                    | ,409                         | ,173                               | ,618        |
| Simplified Suprahepatic Score at discharge | ,438 | ,118                    | ,620                         | ,205                               | ,670        |
| Simplified Portal Score at discharge       | ,479 | ,122                    | ,869                         | ,240                               | ,719        |
| Simplified Intra-renal Score at discharge  | ,531 | ,130                    | ,804                         | ,276                               | ,786        |
| VEXUS 3 at discharge                       | ,458 | ,118                    | ,741                         | ,227                               | ,690        |
| ICV at review: 2 cm or more                | ,771 | ,072                    | ,032                         | ,629                               | ,912        |
| Simplified Suprahepatic Score at review    | ,542 | ,129                    | ,741                         | ,289                               | ,795        |
| Simplified Portal Score at review          | ,611 | ,117                    | ,378                         | ,383                               | ,839        |
| Simplified Intra-renal Score at review     | ,665 | ,098                    | ,191                         | ,473                               | ,857        |
| VEXUS 3 at review                          | ,438 | ,114                    | ,620                         | ,214                               | ,661        |

## 2. ROC CURVE TO PREDICT MORTALITY DURING ADMISSION:

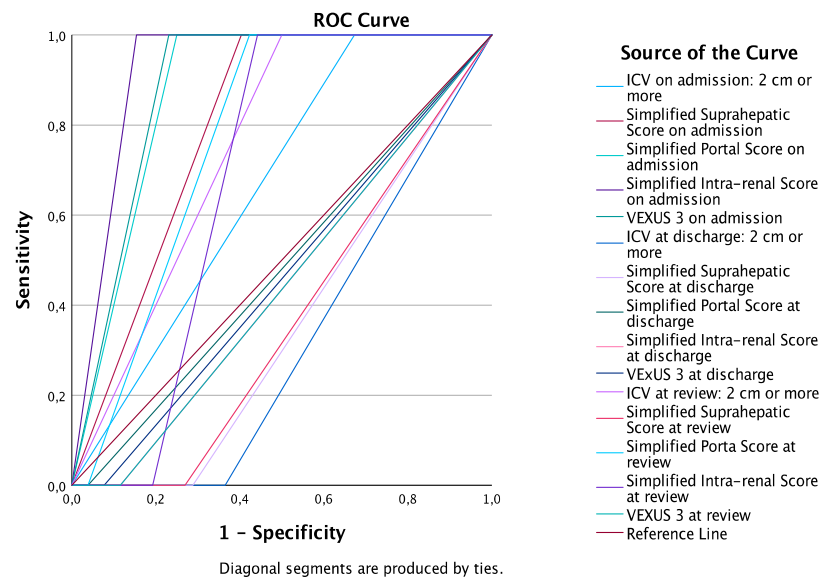

| Test Result Variable(s)                    | Area | Std. Error <sup>a</sup> | Asymptotic Sig. <sup>b</sup> | Asymptotic 95% Confidence Interval |             |
|--------------------------------------------|------|-------------------------|------------------------------|------------------------------------|-------------|
|                                            |      |                         |                              | Lower Bound                        | Upper Bound |
| ICV on admission: 2 cm or more             | ,663 | ,147                    | ,436                         | ,375                               | ,952        |
| Simplified Suprahepatic Score on admission | ,798 | ,095                    | ,156                         | ,611                               | ,985        |
| Simplified Portal Score on admission       | ,875 | ,065                    | ,074                         | ,747                               | 1,000       |
| Simplified Intra-renal Score on admission  | ,923 | ,046                    | ,044                         | ,834                               | 1,000       |
| VEXUS 3 on admission                       | ,885 | ,061                    | ,067                         | ,764                               | 1,000       |
| ICV at discharge: 2 cm or more             | ,317 | ,140                    | ,384                         | ,043                               | ,592        |
| Simplified Suprahepatic Score at discharge | ,356 | ,155                    | ,492                         | ,052                               | ,659        |
| Simplified Portal Score at discharge       | ,481 | ,203                    | ,927                         | ,084                               | ,878        |
| Simplified Intra-renal Score at discharge  | ,442 | ,188                    | ,783                         | ,074                               | ,811        |
| VEXUS 3 at discharge                       | ,462 | ,195                    | ,855                         | ,079                               | ,844        |
| ICV at review: 2 cm or more                | ,750 | ,114                    | ,234                         | ,526                               | ,974        |
| Simplified Suprahepatic Score at review    | ,365 | ,158                    | ,521                         | ,055                               | ,676        |
| Simplified Portal Score at review          | ,769 | ,094                    | ,200                         | ,585                               | ,954        |
| Simplified Intra-renal Score at review     | ,683 | ,079                    | ,384                         | ,527                               | ,838        |
| VEXUS 3 at review                          | ,442 | ,188                    | ,783                         | ,074                               | ,811        |

### 3. ROC CURVE TO PREDICT HEART FAILURE RELATED MORTALITY:

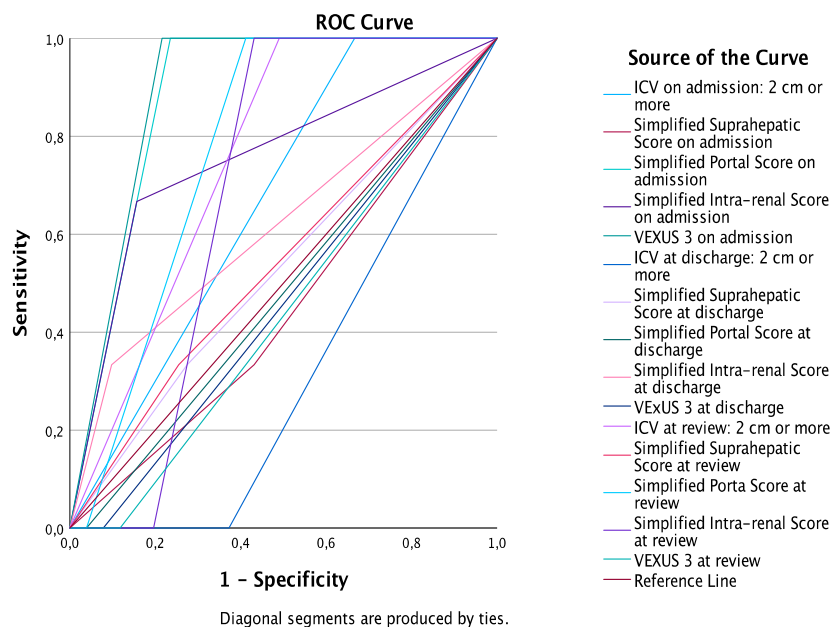

| Test Result Variable(s)                    | Area | Std. Error <sup>a</sup> | Asymptotic Sig. <sup>b</sup> | Asymptotic 95% Confidence Interval |             |
|--------------------------------------------|------|-------------------------|------------------------------|------------------------------------|-------------|
|                                            |      |                         |                              | Lower Bound                        | Upper Bound |
| ICV on admission: 2 cm or more             | ,667 | ,123                    | ,336                         | ,427                               | ,907        |
| Simplified Suprahepatic Score on admission | ,451 | ,169                    | ,777                         | ,120                               | ,782        |
| Simplified Portal Score on admission       | ,882 | ,055                    | ,027                         | ,774                               | ,990        |
| Simplified Intra-renal Score on admission  | ,755 | ,164                    | ,141                         | ,434                               | 1,000       |
| VEXUS 3 on admission                       | ,892 | ,052                    | ,023                         | ,791                               | ,994        |
| ICV at discharge: 2 cm or more             | ,314 | ,117                    | ,282                         | ,085                               | ,542        |
| Simplified Suprahepatic Score at discharge | ,529 | ,176                    | ,865                         | ,184                               | ,875        |
| Simplified Portal Score at discharge       | ,480 | ,167                    | ,910                         | ,153                               | ,808        |
| Simplified Intra-renal Score at discharge  | ,618 | ,188                    | ,497                         | ,249                               | ,986        |
| VEXUS 3 at discharge                       | ,461 | ,161                    | ,821                         | ,145                               | ,777        |
| ICV at review: 2 cm or more                | ,755 | ,095                    | ,141                         | ,568                               | ,942        |
| Simplified Suprahepatic Score at review    | ,539 | ,177                    | ,821                         | ,192                               | ,887        |
| Simplified Portal Score at review          | ,775 | ,080                    | ,113                         | ,618                               | ,931        |
| Simplified Intra-renal Score at review     | ,686 | ,072                    | ,282                         | ,545                               | ,828        |
| VEXUS 3 at review                          | ,441 | ,155                    | ,734                         | ,137                               | ,746        |

#### 4. ROC CURVE TO PREDICT RE-ADMISSION:

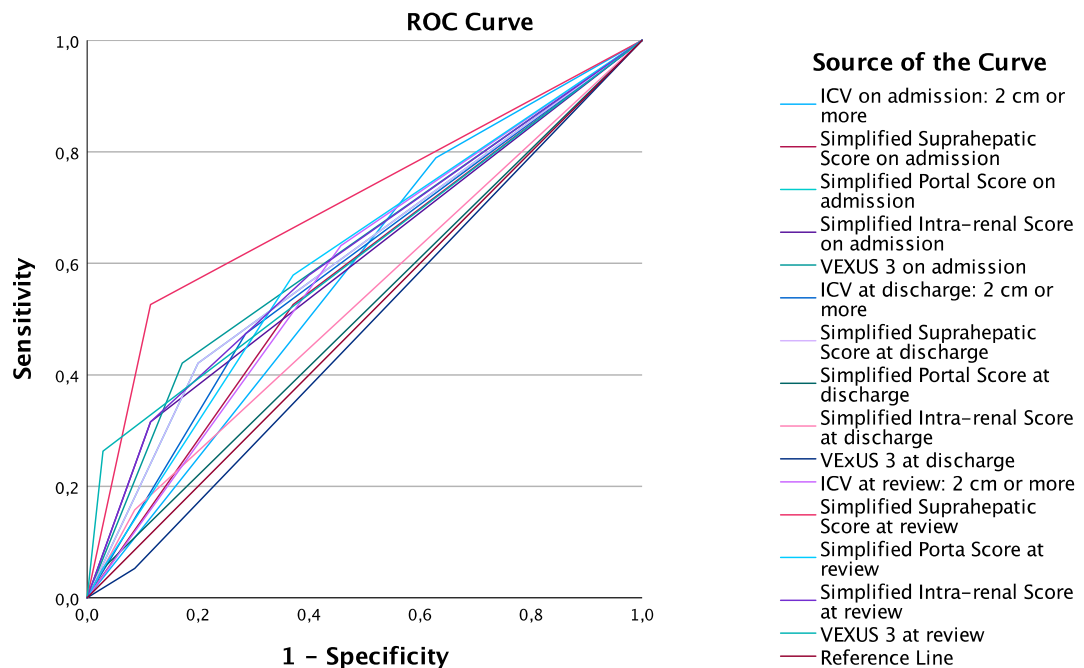

Diagonal segments are produced by ties.

| Test Result Variable(s)                    | Area | Std. Error <sup>a</sup> | Asymptotic Sig. <sup>b</sup> | Asymptotic 95% Confidence Interval |             |
|--------------------------------------------|------|-------------------------|------------------------------|------------------------------------|-------------|
|                                            |      |                         |                              | Lower Bound                        | Upper Bound |
| ICV on admission: 2 cm or more             | ,580 | ,080                    | ,333                         | ,423                               | ,738        |
| Simplified Suprahepatic Score on admission | ,577 | ,082                    | ,351                         | ,416                               | ,739        |
| Simplified Portal Score on admission       | ,611 | ,083                    | ,183                         | ,448                               | ,773        |
| Simplified Intra-renal Score on admission  | ,601 | ,084                    | ,225                         | ,436                               | ,766        |
| VEXUS 3 on admission                       | ,625 | ,083                    | ,133                         | ,462                               | ,787        |
| ICV at discharge: 2 cm or more             | ,594 | ,083                    | ,258                         | ,432                               | ,756        |
| Simplified Suprahepatic Score at discharge | ,611 | ,083                    | ,183                         | ,448                               | ,773        |
| Simplified Portal Score at discharge       | ,512 | ,084                    | ,885                         | ,348                               | ,676        |
| Simplified Intra-renal Score at discharge  | ,536 | ,084                    | ,664                         | ,371                               | ,701        |
| VEXUS 3 at discharge                       | ,483 | ,082                    | ,842                         | ,322                               | ,645        |
| ICV at review: 2 cm or more                | ,587 | ,081                    | ,293                         | ,428                               | ,747        |
| Simplified Suprahepatic Score at review    | ,706 | ,079                    | ,013                         | ,550                               | ,862        |
| Simplified Portal Score at review          | ,605 | ,082                    | ,205                         | ,445                               | ,765        |
| Simplified Intra-renal Score at review     | ,620 | ,083                    | ,150                         | ,457                               | ,782        |
| VEXUS 3 at review                          | ,617 | ,085                    | ,158                         | ,451                               | ,783        |

## 5. ROC CURVE TO PREDICT RE-ADMISSION DURING THE FIRST MONTH:

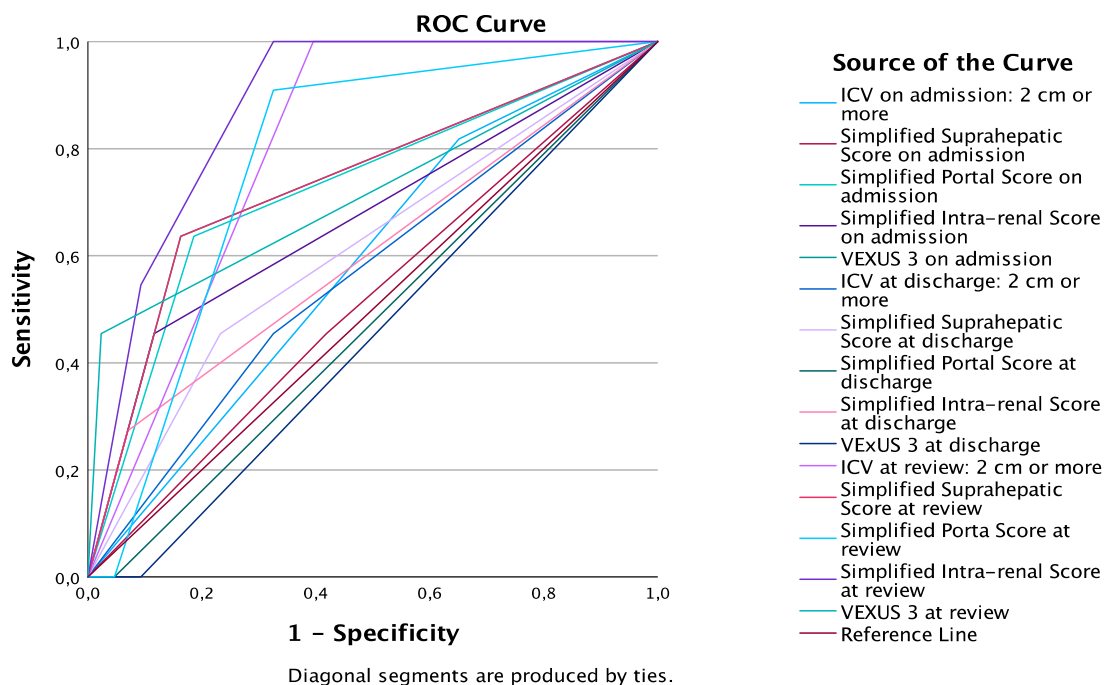

| Test Result Variable(s)                    | Area | Std. Error <sup>a</sup> | Asymptotic Sig. <sup>b</sup> | Asymptotic 95% Confidence Interval |             |
|--------------------------------------------|------|-------------------------|------------------------------|------------------------------------|-------------|
|                                            |      |                         |                              | Lower Bound                        | Upper Bound |
| ICV on admission: 2 cm or more             | ,584 | ,092                    | ,396                         | ,402                               | ,765        |
| Simplified Suprahepatic Score on admission | ,518 | ,099                    | ,855                         | ,325                               | ,711        |
| Simplified Portal Score on admission       | ,725 | ,093                    | ,022                         | ,543                               | ,907        |
| Simplified Intra-renal Score on admission  | ,669 | ,101                    | ,086                         | ,471                               | ,867        |
| VEXUS 3 on admission                       | ,737 | ,093                    | ,016                         | ,555                               | ,918        |
| ICV at discharge: 2 cm or more             | ,564 | ,099                    | ,512                         | ,370                               | ,759        |
| Simplified Suprahepatic Score at discharge | ,611 | ,100                    | ,260                         | ,415                               | ,807        |
| Simplified Portal Score at discharge       | ,477 | ,096                    | ,813                         | ,289                               | ,664        |
| Simplified Intra-renal Score at discharge  | ,601 | ,104                    | ,303                         | ,398                               | ,805        |
| VEXUS 3 at discharge                       | ,453 | ,093                    | ,637                         | ,271                               | ,636        |
| ICV at review: 2 cm or more                | ,802 | ,059                    | ,002                         | ,687                               | ,917        |
| Simplified Suprahepatic Score at review    | ,737 | ,093                    | ,016                         | ,555                               | ,918        |
| Simplified Porta Score at review           | ,771 | ,070                    | ,006                         | ,633                               | ,908        |
| Simplified Intra-renal Score at review     | ,879 | ,046                    | ,000                         | ,789                               | ,970        |
| VEXUS 3 at review                          | ,716 | ,102                    | ,028                         | ,516                               | ,916        |

## 6. ROC CURVE TO PREDICT HEART FAILURE RE-ADMISSION:

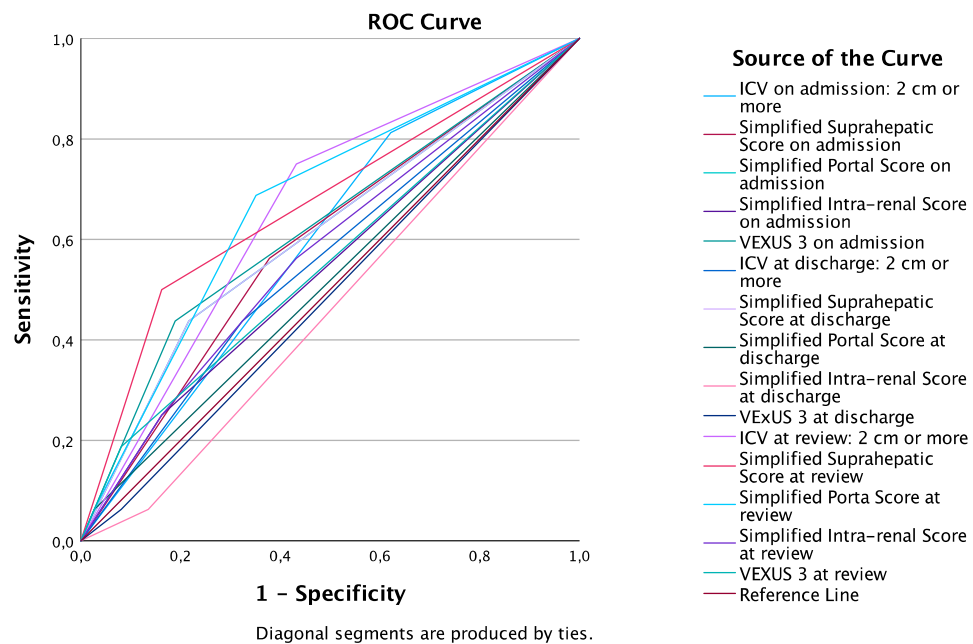

| Test Result Variable(s)                    | Area | Std. Error <sup>a</sup> | Asymptotic Sig. <sup>b</sup> | Asymptotic 95% Confidence Interval |             |
|--------------------------------------------|------|-------------------------|------------------------------|------------------------------------|-------------|
|                                            |      |                         |                              | Lower Bound                        | Upper Bound |
| ICV on admission: 2 cm or more             | ,595 | ,083                    | ,274                         | ,433                               | ,757        |
| Simplified Suprahepatic Score on admission | ,592 | ,086                    | ,291                         | ,423                               | ,761        |
| Simplified Portal Score on admission       | ,611 | ,088                    | ,204                         | ,439                               | ,782        |
| Simplified Intra-renal Score on admission  | ,544 | ,089                    | ,614                         | ,370                               | ,718        |
| VEXUS 3 on admission                       | ,624 | ,088                    | ,154                         | ,452                               | ,796        |
| ICV at discharge: 2 cm or more             | ,557 | ,088                    | ,516                         | ,385                               | ,728        |
| Simplified Suprahepatic Score at discharge | ,611 | ,088                    | ,204                         | ,439                               | ,782        |
| Simplified Portal Score at discharge       | ,518 | ,088                    | ,839                         | ,345                               | ,691        |
| Simplified Intra-renal Score at discharge  | ,464 | ,085                    | ,677                         | ,297                               | ,630        |
| VEXUS 3 at discharge                       | ,491 | ,087                    | ,915                         | ,321                               | ,660        |
| ICV at review: 2 cm or more                | ,659 | ,081                    | ,069                         | ,501                               | ,817        |
| Simplified Suprahepatic Score at review    | ,669 | ,086                    | ,053                         | ,500                               | ,838        |
| Simplified Portal Score at review          | ,670 | ,082                    | ,052                         | ,510                               | ,830        |
| Simplified Intra-renal Score at review     | ,573 | ,087                    | ,399                         | ,403                               | ,744        |
| VEXUS 3 at review                          | ,553 | ,089                    | ,542                         | ,378                               | ,728        |
